# Supplementary material for: A qualitative study to understand the challenges of conducting randomised controlled trials of complex interventions in metastatic colorectal cancer
Source: Springer Nature journal article supplement (doi:10.1186/s13063-025-08811-z), 2025-03-19
Supplement: MOESM1 [file 13063_2025_8811_MOESM1_ESM.pdf]

## **Topic Guide for Interviews**

### **Understanding the challenges of conducting trials in metastatic colorectal cancer**

#### **1. Introduction**

- Study overview
- Funder – Bowel Diseases Research Foundation
- Outline selection of participants

#### **2. Aims of Study**

- Informal discussion to gauge challenges to conducting trials in metastatic colorectal cancer

#### **3. Confidentiality**

- Audio-recording of all interviews
- Reiterate anonymity of all data
- Ensure obtained consent
- Voluntary withdrawal at any time during the interview

#### **4. Audio-recorded Interview**

##### **a. Opening Questions**

- Overview of trial
- Role within the trial or trial management group

##### **b. Questions**

- Can you tell me of any specific challenges you think are unique to conducting a trial in patients with metastatic colorectal cancer?
- Have you experienced any challenges in conducting a trial in metastatic colorectal cancer? What are these?
- What do you think the challenges are in recruiting patients with metastatic colorectal cancer to clinical trials?
- What do you think the challenges are in following up patients with metastatic disease?
- Have you employed any strategies to help overcome any recruitment/follow up challenges you may have faced?

#### **5. Close of interview**
